# Supplementary material for: A Framework to Identify Antigen-Expanded T Cell Receptor Clusters Within Complex Repertoires
Source: PubMed Central journal article supplement (PMC8670329; doi:10.3389/fimmu.2021.735584), 2021-11-30
Supplement: DataSheet_1.pdf [file DataSheet_1.pdf]

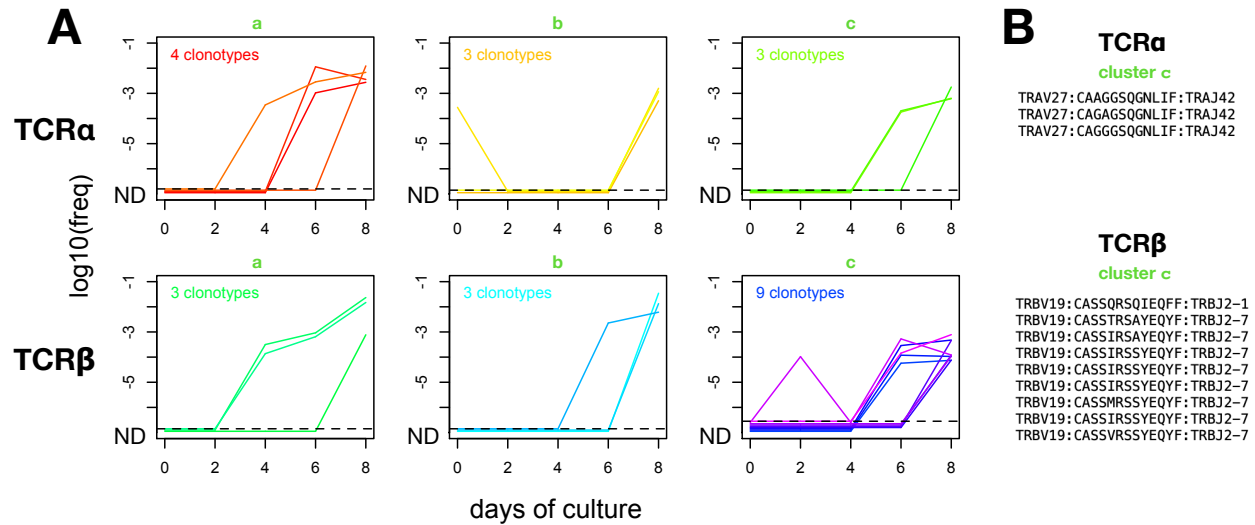

**Supplemental Figure 1. Clonotype-level kinetics of CET expansion during culture with CD40-targeted M1.** **A** Cells from donor ND1007 were expanded with CD40-targeted Flu M1 protein or no antigen as a control. At days 0, 2, 4, 6 and 8 of culture, aliquots of cells were collected and TCRs enumerated from the RNA. Analysis of the day 8 samples identified 3 TCR $\alpha$  and 3 TCR $\beta$  antigen-responsive CETs (1 per plot): shown are the clonotype frequencies at each timepoint of the members of these CETs (1 line per clonotype). **B** Segment usage and CDR3 amino acid sequences of clonotypes in TCR $\alpha$  cluster c and TCR $\beta$  cluster c, matching the motifs of TCRs previously described for CD8<sup>+</sup> T cells recognizing the immunodominant HLA-A2-restricted Flu M1 peptide GILGFVFTL.

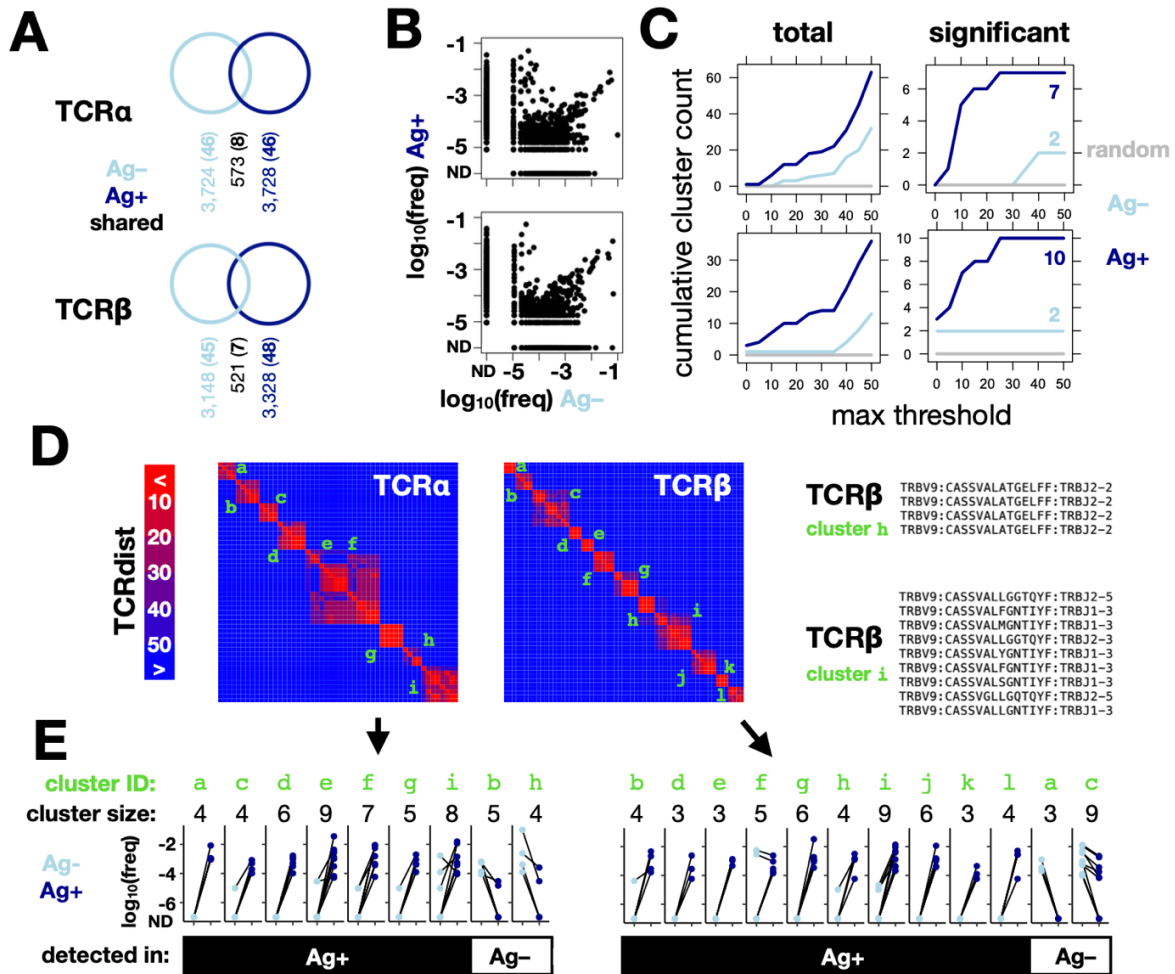

**Supplemental Figure 2. CET analysis identifies Mtb-responsive clonotypes.** PBMCs from a subject latently-infected with Mtb were cultured with IL-2 for 10 days, in the presence (Ag+) or absence (Ag-) of Mtb lysate, after which RNA was extracted for amplification of TCR $\alpha$  and TCR $\beta$  chains, sequenced and analyzed using the scheme shown in Figure 2. Panels A-E are exactly as described for the corresponding Influenza M1 panels of Figure 3, with the exception that the clusters highlighted at the right-hand side of D now correspond to a motif known to recognize the Mtb peptide MHVSFVMAYPEMLAA presented by HLA-DRB1\*15:03.

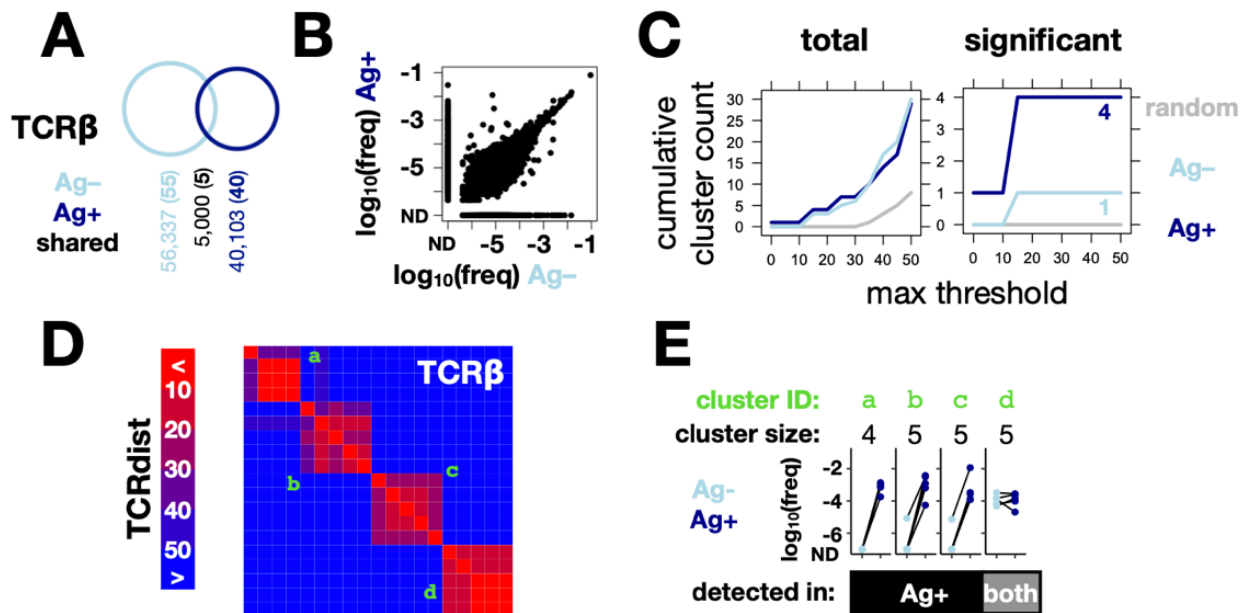

**Supplemental Figure 3. CET analysis identifies HIV-responsive clonotypes.** PBMCs from a subject latently-infected with Mtb were cultured with IL-2 for 10 days, in the presence (Ag+) or absence (Ag-) of a string of five conserved T-cell epitopes of HIV-1 Gag, Nef and Pol (17) after which DNA was extracted for amplification of TCRβ chains, sequenced and analyzed using the scheme shown in Figure 2. Panels A-E are exactly as described for the corresponding Influenza M1 panels of Figure 3.

**A**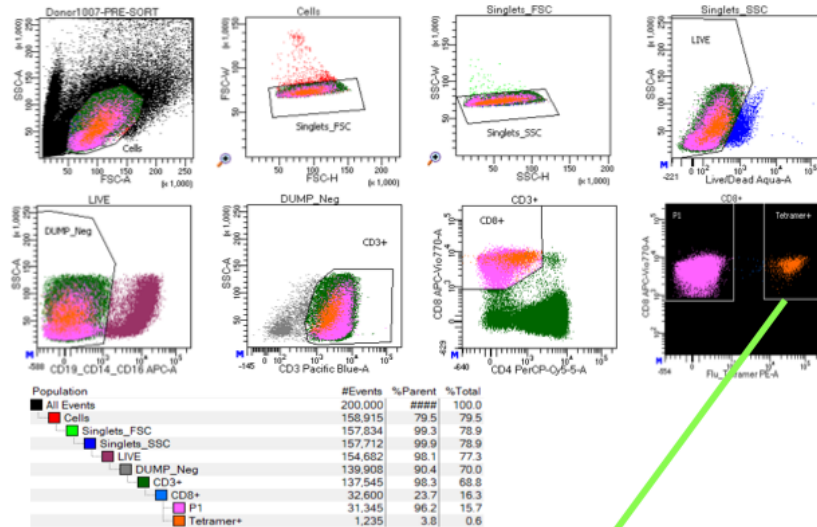**B**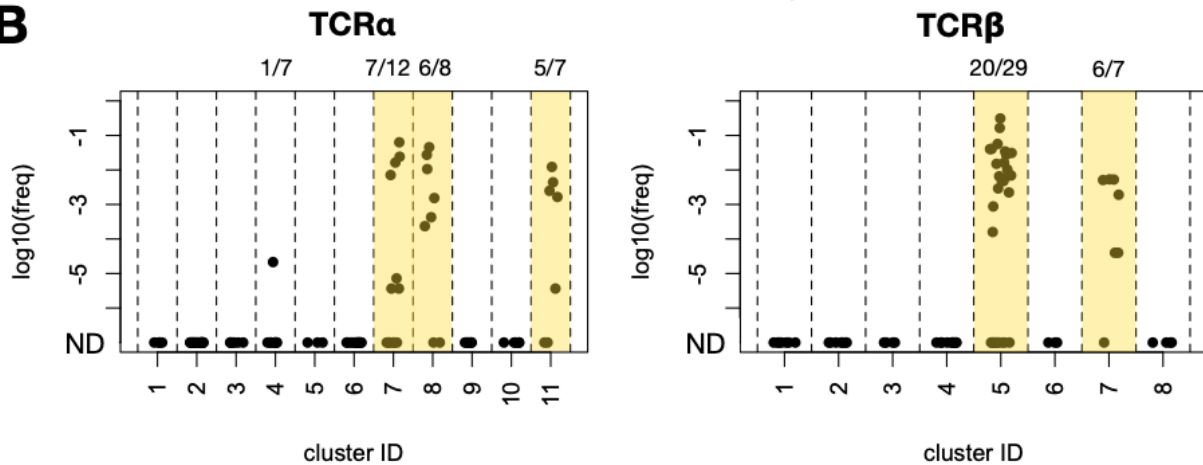

**Supplemental Figure 4. Clonotypes identified by CET analysis of unsorted cultures match those identified by cell sorting based on antigen binding.** **A** Cells from donor ND1005 were expanded with CD40-targeted Flu M1 protein. Those recognizing the HLA-A2:GILGFVFTL immunodominant M1 epitope were isolated by cell sorting using a fluorescent peptide:MHC tetramer, using the gating strategy shown. **B** TCRs from sorted cells were enumerated from the resulting total RNA as described. Shown are the frequencies among total TCR $\alpha$  (*left*) or TCR $\beta$  (*right*) chains from sorted cells (*y*-axis) of all clonotypes previously identified by the CET analysis from this donor (independently of tetramer, using the same analysis and cluster identities shown Figure 5B). For each cluster containing  $\geq 1$  clonotype detectable in the sorted cells, the numbers of detectable / total clonotypes are listed at the top of the plot. Highlighted in yellow are the 5 CETs identified in cells cultured with the '14,15,16' peptide pool containing the GILGFVFTL sequence.

| DONOR               | HLA-A | HLA-A  | HLA-B | HLA-B | HLA-C | HLA-C | HLA-DRB | HLA-DRB | HLA-DQB | HLA-DQB | HLA-DPB | HLA-DPB |
|---------------------|-------|--------|-------|-------|-------|-------|---------|---------|---------|---------|---------|---------|
| <b>ND1001</b>       | 03:01 | 68:01  | 45:01 | 51:01 | 02:02 | 6:02  | 4:01    | 7:01    | 2:02    | 3:01    | 3:01    | 10:01   |
| <b>ND1002</b>       | 24:02 | 31:02  | 35:01 |       | 4:01  |       | 4:07    | 9:01    | 3:02    | 3:03    | 4:01    | 4:02    |
| <b>ND1004</b>       | 01:01 | 02:206 | 08:01 | 15:01 | 3:04  | 7:01  | 1:01    | 7:01    | 2:02    | 5:01    | 3:01    | 14:01   |
| <b>ND1005</b>       | 02:01 | 29:02  | 44:02 | 44:03 | 5:01  | 16:01 | 07:01   | 13:01   | 2:02    | 6:03    | 11:01   | 14:01   |
| <b>ND1007</b>       | 02:01 | 02:01  | 08:01 | 40:01 | 03:04 | 07:01 | 03:01   | 13:02   | 02:01   | 06:04   | 03:01   | 04:01   |
| <b>DONOR #30115</b> | 02:05 | 23:17  | 8:01  | 15:18 | 3:04  | 7:02  | 11:02   | 15:03   | 3:01    | 6:02    | 105:01  | 105:01  |
| <b>DONOR A12</b>    | 01:01 | 74:01  | 13:02 | 57:01 | 06:02 |       | 04:01   | 07:01   | 03:02   | 03:03   | NA      | NA      |

**Supplemental Table 1. HLA genotype of donors used in the study.** Highlighted cells indicate alleles known (from previous studies) to present peptides recognized by TCR motifs detected here. NA indicates genotypes not available.

| Peptide  | Length | Sequence                 | precipitate level  |
|----------|--------|--------------------------|--------------------|
| 01 of 60 | 15     | 1-MSLLTEVETYVLSII-15     | medium             |
| 02 of 60 | 16     | 5-TEVETYVLSIIPSGPL-20    | not soluble at all |
| 03 of 60 | 15     | 9-TYVLSIIPSGPLKAE-23     | none               |
| 04 of 60 | 15     | 13-SIIPSGPLKAEIAQR-27    | none               |
| 05 of 60 | 15     | 17-SGPLKAEIAQRLESV-31    | low                |
| 06 of 60 | 15     | 21-KAEIAQRLESVFAGK-35    | none               |
| 07 of 60 | 15     | 25-AQRLESVFAGKNTDL-39    | none               |
| 08 of 60 | 15     | 29-ESVFAGKNTDLEALM-43    | none               |
| 09 of 60 | 15     | 33-AGKNTDLEALMEWLK-47    | none               |
| 10 of 60 | 15     | 37-TDLEALMEWLKTRPI-51    | none               |
| 11 of 60 | 15     | 41-ALMEWLKTRPILSPL-55    | none               |
| 12 of 60 | 15     | 45-WLKTRPILSPLTKGI-59    | none               |
| 13 of 60 | 15     | 49-RPILSPLTKGILGFV-63    | none               |
| 14 of 60 | 15     | 53-SPLTKGILGFVFTLT-67    | none               |
| 15 of 60 | 15     | 57-KGILGFVFTLTPSE-71     | none               |
| 16 of 60 | 15     | 61-GFVFTLTPSERGLQ-75     | none               |
| 17 of 60 | 15     | 65-TLTPSERGLQRRRF-79     | none               |
| 18 of 60 | 15     | 69-PSERGLQRRRFVQNA-83    | none               |
| 19 of 60 | 15     | 73-GLQRRRFVQNALNGN-87    | none               |
| 20 of 60 | 15     | 77-RRFVQNALNGNDPN-91     | none               |
| 21 of 60 | 14     | 82-NALNGNDPNMMDR-95      | none               |
| 22 of 60 | 15     | 85-NGNDPNMMDRAVKL-99     | none               |
| 23 of 60 | 15     | 89-DPNMMDRAVKLYKKL-103   | none               |
| 24 of 60 | 15     | 93-MDRAVKLYKKLKREI-107   | none               |
| 25 of 60 | 15     | 97-VKLYKKLKREITFHG-111   | none               |
| 26 of 60 | 15     | 101-KKLYKREITFHGAKEV-115 | none               |
| 27 of 60 | 15     | 105-REITFHGAKEVLSY-119   | none               |
| 28 of 60 | 15     | 109-FHGAKEVLSYSTGA-123   | none               |
| 29 of 60 | 15     | 113-KEVLSYSTGALASC-127   | low                |
| 30 of 60 | 15     | 117-LSYSTGALASCMLI-131   | medium             |
| 31 of 60 | 15     | 121-TGALASCMLIYNRM-135   | high               |
| 32 of 60 | 15     | 125-ASCMGLIYNRMGTVT-139  | none               |
| 33 of 60 | 15     | 129-GLIYNRMGTVTTEAA-143  | low                |
| 34 of 60 | 15     | 133-NRMGTVTTEAAFGLV-147  | none               |
| 35 of 60 | 15     | 137-TVTTEAAFGLVLCATC-151 | medium             |
| 36 of 60 | 15     | 141-EAAFGLVLCATCEQIA-155 | high               |
| 37 of 60 | 15     | 145-GLVCATCEQIADSQH-159  | none               |
| 38 of 60 | 15     | 149-ATCEQIADSQHRSHR-163  | none               |
| 39 of 60 | 14     | 154-IADSQHRSHRQMAT-167   | none               |
| 40 of 60 | 16     | 157-SQHRSHRQMATTTNPL-172 | none               |
| 41 of 60 | 15     | 161-SHRQMATTTNPLIRH-175  | none               |
| 42 of 60 | 15     | 165-MATTTNPLIRHENRM-179  | none               |
| 43 of 60 | 15     | 169-TNPLIRHENRMVLAS-183  | none               |
| 44 of 60 | 15     | 173-IRHENRMVLASTAK-187   | none               |
| 45 of 60 | 15     | 177-NRMVLASTAKAMEQ-191   | none               |
| 46 of 60 | 15     | 181-LASTAKAMEQMAGS-195   | none               |
| 47 of 60 | 15     | 185-TAKAMEQMAGSSEQA-199  | high               |
| 48 of 60 | 15     | 189-MEQMAGSSEQAAEAM-203  | not soluble at all |
| 49 of 60 | 15     | 193-AGSSEQAAEAMEVAN-207  | medium             |
| 50 of 60 | 15     | 197-EQAAEAMEVANQTRQ-211  | none               |
| 51 of 60 | 15     | 201-EAMEVANQTRQMVHA-215  | medium             |
| 52 of 60 | 15     | 205-VANQTRQMVHAMRTI-219  | none               |
| 53 of 60 | 16     | 209-TRQMVHAMRTIGTHPS-224 | none               |
| 54 of 60 | 15     | 213-VHAMRTIGTHPSSSA-227  | none               |
| 55 of 60 | 15     | 217-RTIGTHPSSSAGLKD-231  | none               |
| 56 of 60 | 15     | 221-THPSSSAGLKDDLE-235   | none               |
| 57 of 60 | 15     | 225-SSAGLKDDLLENLQA-239  | high               |
| 58 of 60 | 15     | 229-LKDDLLENLQAYQKR-243  | none               |
| 59 of 60 | 15     | 233-LLENLQAYQKRMGVQ-247  | none               |
| 60 of 60 | 16     | 237-LQAYQKRMGVQMQRFK-252 | none               |

**Supplemental Table 2. Influenza Matrix 1 (FluM1) peptides sequences and solubility.** Entries are colored according to peptide group. Yellow=cluster 1, gray=cluster 2, green=cluster 3.

| Donor  | CD4 <sup>+</sup> T cell response |    |    | CD8 <sup>+</sup> T cell response |    |    |
|--------|----------------------------------|----|----|----------------------------------|----|----|
|        | C1                               | C2 | C3 | C1                               | C2 | C3 |
| ND1001 |                                  |    |    |                                  |    |    |
| ND1002 |                                  |    |    |                                  |    |    |
| ND1004 |                                  |    |    |                                  |    |    |
| ND1005 |                                  |    |    |                                  |    |    |
| ND1007 |                                  |    |    |                                  |    |    |

**Supplemental Table 3.** Screening of normal donors for Flu M1 peptide region-specific CD4<sup>+</sup> or CD8<sup>+</sup> T cell responses to anti-CD40 11B6-CD40L: M1 stimulation in PBMC cultures as described for ND1004 and ND1005 in Figure 1. The shaded boxes indicate that anti-CD40 11B6-CD40L: M1 stimulation (0.01-0.1 nM) elicited IFN $\gamma$ <sup>+</sup> and TNF $\alpha$ <sup>+</sup> T cells upon re-stimulation with the indicated peptide clusters (C1-3), while the same PBMCs cultured with equivalent or higher doses of M1 protein did not elicit IFN $\gamma$ <sup>+</sup> and TNF $\alpha$ <sup>+</sup> T cells.

| analysis_name       | donor  | culture_antigen      | sequence_name_R1                                                         | cell_input | number_of_read_pairs |
|---------------------|--------|----------------------|--------------------------------------------------------------------------|------------|----------------------|
| JK1503posIL2only    | 30115  | no antigen           | HUMAN-JK1503posIL2-098_S1_L001_R1_001.fastq.gz                           | 1.00E+06   | 1,009,368            |
| JK1503poslystate    | 30115  | Mtb lystae           | HUMAN-JK1503posMtblystate-098_S2_L001_R1_001.fastq.gz                    | 1.00E+06   | 1,435,268            |
| NT_1_deep           | ND1001 | no culture (ex vivo) | HUMAN-Donor1NoTreatment-097_S5_L001_R1_001.fastq.gz                      | 1.00E+06   | 4,684,816            |
| NT_1                | ND1001 | no culture (ex vivo) | HUMAN-Donor1NoTreatmentA-097_S1_L001_R1_001.fastq.gz                     | 1.00E+07   | 153,544              |
| NT_2_deep           | ND1002 | no culture (ex vivo) | HUMAN-Donor2NoTreatment-097_S7_L001_R1_001.fastq.gz                      | 1.00E+06   | 114,771              |
| NT_2                | ND1002 | no culture (ex vivo) | HUMAN-Donor2NoTreatmentA-097_S4_L001_R1_001.fastq.gz                     | 2.00E+06   | 2,908,348            |
| P10P11P12.1         | ND1004 | peptides 10+11+12    | HUMAN-23Pep1011121-097_S36_L001_R1_001.fastq.gz                          | 2.00E+05   | 274,957              |
| P10P11P12.2         | ND1004 | peptides 10+11+12    | HUMAN-23Pep1011122-097_S39_L001_R1_001.fastq.gz                          | 2.00E+05   | 407,871              |
| P123.1              | ND1004 | peptides 1+2+3       | HUMAN-23Pep1231-097_S43_L001_R1_001.fastq.gz                             | 2.00E+05   | 246,620              |
| P123.2              | ND1004 | peptides 1+2+3       | HUMAN-23Pep1232-097_S51_L001_R1_001.fastq.gz                             | 2.00E+05   | 376,771              |
| P14P15P16.1         | ND1004 | peptides 14+15+16    | HUMAN-23Pep1415161-097_S28_L001_R1_001.fastq.gz                          | 2.00E+05   | 348,246              |
| P14P15P16.2         | ND1004 | peptides 14+15+16    | HUMAN-23Pep1415162-097_S32_L001_R1_001.fastq.gz                          | 2.00E+05   | 429,885              |
| P24.1               | ND1004 | peptide 24           | HUMAN-23Pep241-097_S37_L001_R1_001.fastq.gz                              | 2.00E+05   | 499,013              |
| P24.2               | ND1004 | peptide 24           | HUMAN-23Pep242-097_S41_L001_R1_001.fastq.gz                              | 2.00E+05   | 407,680              |
| P26P27.1            | ND1004 | peptides 26+27       | HUMAN-23Pep26271-097_S30_L001_R1_001.fastq.gz                            | 2.00E+05   | 476,688              |
| P26P27.2            | ND1004 | peptides 26+27       | HUMAN-23Pep26272-097_S45_L001_R1_001.fastq.gz                            | 2.00E+05   | 461,019              |
| P32P33.1            | ND1004 | peptides 32+33       | HUMAN-23Pep32331-097_S34_L001_R1_001.fastq.gz                            | 2.00E+05   | 284,323              |
| P32P33.2            | ND1004 | peptides 32+33       | HUMAN-23Pep32332-097_S47_L001_R1_001.fastq.gz                            | 2.00E+05   | 520,708              |
| P43.1               | ND1004 | peptide 43           | HUMAN-23Pep431-097_S46_L001_R1_001.fastq.gz                              | 2.00E+05   | 424,843              |
| P43.2               | ND1004 | peptide 43           | HUMAN-23Pep432-097_S54_L001_R1_001.fastq.gz                              | 2.00E+05   | 331,515              |
| P45.1               | ND1004 | peptide 45           | HUMAN-23Pep451-097_S49_L001_R1_001.fastq.gz                              | 2.00E+05   | 431,281              |
| P45.2               | ND1004 | peptide 45           | HUMAN-23Pep452-097_S53_L001_R1_001.fastq.gz                              | 2.00E+05   | 366,514              |
| P5.1                | ND1004 | peptide 5            | HUMAN-23Pep51-097_S48_L001_R1_001.fastq.gz                               | 2.00E+05   | 470,650              |
| P5.2                | ND1004 | peptide 5            | HUMAN-23Pep52-097_S52_L001_R1_001.fastq.gz                               | 2.00E+05   | 351,102              |
| P53.1               | ND1004 | peptide 53           | HUMAN-23Pep531-097_S44_L001_R1_001.fastq.gz                              | 2.00E+05   | 336,232              |
| P53.2               | ND1004 | peptide 53           | HUMAN-23Pep532-097_S50_L001_R1_001.fastq.gz                              | 2.00E+05   | 229,900              |
| P60.1               | ND1004 | peptide 60           | HUMAN-23Pep601-097_S38_L001_R1_001.fastq.gz                              | 2.00E+05   | 398,584              |
| P60.2               | ND1004 | peptide 60           | HUMAN-23Pep602-097_S42_L001_R1_001.fastq.gz                              | 2.00E+05   | 469,571              |
| CD40Lflu01_4        | ND1004 | targeted M1          | HUMAN_donor411B6CD40LFluM101nM_097_S3_L001_R1_001.fastq.gz               | 1.00E+06   | 2,072,034            |
| CD40Lflu1_4         | ND1004 | targeted M1          | HUMAN_donor411B6CD40LFluM11nM_097_S2_L001_R1_001.fastq.gz                | 1.00E+06   | 1,431,763            |
| flu01_4             | ND1004 | untargeted M1        | HUMAN_donor4ControlFluM101nM_097_S5_L001_R1_001.fastq.gz                 | 1.00E+06   | 1,850,465            |
| flu1_4              | ND1004 | untargeted M1        | HUMAN_donor4ControlFluM11nM_097_S4_L001_R1_001.fastq.gz                  | 1.00E+06   | 2,498,245            |
| NT_4                | ND1004 | no culture (ex vivo) | HUMAN_donor4Notreatment_097_S1_L001_R1_001.fastq.gz                      | 2.00E+06   | 13,134               |
| NT_4_deep           | ND1004 | no culture (ex vivo) | HUMAN-Donor4NoTreatment-097_S2_L001_R1_001.fastq.gz                      | 1.00E+06   | 3,897,412            |
| expandedonly_4      | ND1004 | no antigen           | HUMAN_donor4notreatmentbutexpansioncultured_097_S6_L001_R1_001.fastq.gz  | 1.00E+06   | 1,988,081            |
| P1112.1             | ND1005 | peptides 11+12       | HUMAN-21Pep11121-097_S2_L001_R1_001.fastq.gz                             | 2.00E+05   | 531,112              |
| P1112.2             | ND1005 | peptides 11+12       | HUMAN-21Pep11122-097_S4_L001_R1_001.fastq.gz                             | 2.00E+05   | 282,281              |
| P1112.3             | ND1005 | peptides 11+12       | HUMAN-21Pep11123-097_S9_L001_R1_001.fastq.gz                             | 2.00E+05   | 483,534              |
| P141516.1           | ND1005 | peptide 14+15+16     | HUMAN-21Pep1415161-097_S3_L001_R1_001.fastq.gz                           | 2.00E+05   | 448,136              |
| P141516.2           | ND1005 | peptide 14+15+16     | HUMAN-21Pep1415162-097_S8_L001_R1_001.fastq.gz                           | 2.00E+05   | 354,092              |
| P2.1                | ND1005 | peptide 2            | HUMAN-21Pep21-097_S1_L001_R1_001.fastq.gz                                | 2.00E+05   | 394,835              |
| P2.2                | ND1005 | peptide 2            | HUMAN-21Pep22-097_S5_L001_R1_001.fastq.gz                                | 2.00E+05   | 599,761              |
| P2.3                | ND1005 | peptide 2            | HUMAN-21Pep23-097_S7_L001_R1_001.fastq.gz                                | 2.00E+05   | 340,274              |
| P2324.1             | ND1005 | peptides 23+24       | HUMAN-21Pep23241-097_S10_L001_R1_001.fastq.gz                            | 2.00E+05   | 97,289               |
| P2324.2             | ND1005 | peptides 23+24       | HUMAN-21Pep23242-097_S14_L001_R1_001.fastq.gz                            | 2.00E+05   | 431,875              |
| P2627.1             | ND1005 | peptides 26+27       | HUMAN-21Pep26271-097_S20_L001_R1_001.fastq.gz                            | 2.00E+05   | 339,428              |
| P2627.2             | ND1005 | peptides 26+27       | HUMAN-21Pep26272-097_S22_L001_R1_001.fastq.gz                            | 2.00E+05   | 621,521              |
| P31.1               | ND1005 | peptide 31           | HUMAN-21Pep311-097_S6_L001_R1_001.fastq.gz                               | 2.00E+05   | 442,763              |
| P31.2               | ND1005 | peptide 31           | HUMAN-21Pep312-097_S17_L001_R1_001.fastq.gz                              | 2.00E+05   | 529,438              |
| P31.3               | ND1005 | peptide 31           | HUMAN-21Pep313-097_S18_L001_R1_001.fastq.gz                              | 2.00E+05   | 495,291              |
| P59.2               | ND1005 | peptide 59           | HUMAN-21Pep592-097_S21_L001_R1_001.fastq.gz                              | 2.00E+05   | 389,932              |
| P59.3               | ND1005 | peptide 59           | HUMAN-21Pep593-097_S25_L001_R1_001.fastq.gz                              | 2.00E+05   | 407,107              |
| CD40Lflu01_5        | ND1005 | targeted M1          | HUMAN_donor511B6CD40LFluM101nM_097_S9_L001_R1_001.fastq.gz               | 1.00E+06   | 1,283,486            |
| CD40Lflu1_5         | ND1005 | targeted M1          | HUMAN_donor511B6CD40LFluM11nM_097_S8_L001_R1_001.fastq.gz                | 1.00E+06   | 2,839,039            |
| flu01_5             | ND1005 | untargeted M1        | HUMAN_donor5ControlFluM101nM_097_S11_L001_R1_001.fastq.gz                | 1.00E+06   | 2,069,945            |
| flu1_5              | ND1005 | untargeted M1        | HUMAN_donor5ControlFluM11nM_097_S10_L001_R1_001.fastq.gz                 | 1.00E+06   | 2,027,023            |
| NT_5_deep           | ND1005 | no culture (ex vivo) | HUMAN-Donor5NoTreatment-097_S1_L001_R1_001.fastq.gz                      | 1.00E+06   | 4,099,780            |
| NT_5                | ND1005 | no culture (ex vivo) | HUMAN_donor5Notreatment_097_S7_L001_R1_001.fastq.gz                      | 1.00E+06   | 697,106              |
| expandedonly_5      | ND1005 | no antigen           | HUMAN_donor5notreatmentbutexpansioncultured_097_S12_L001_R1_001.fastq.gz | 1.00E+06   | 1,253,635            |
| GIltetramerSorted_5 | ND1005 | targeted M1          | ND1005_SORT_TET_01nM_CD4011B6_CD40Ldoc_cohFluM1_S8_L001_R1_001.fastq.gz  | 4.00E+04   | 673,059              |
| D0_7                | ND1007 | targeted M1          | ND1007_KINETICS_D0_CD4011B6_CD40Ldoc_cohFluM1_S12_L001_R1_001.fastq.gz   | 1.00E+06   | 805,507              |
| D2_7                | ND1007 | targeted M1          | ND1007_KINETICS_D2_CD4011B6_CD40Ldoc_cohFluM1_S13_L001_R1_001.fastq.gz   | 1.00E+06   | 648,065              |
| D4_7                | ND1007 | targeted M1          | ND1007_KINETICS_D4_CD4011B6_CD40Ldoc_cohFluM1_S14_L001_R1_001.fastq.gz   | 1.00E+06   | 593,103              |
| D6_7                | ND1007 | targeted M1          | ND1007_KINETICS_D6_CD4011B6_CD40Ldoc_cohFluM1_S15_L001_R1_001.fastq.gz   | 1.00E+06   | 537,956              |
| D8_7                | ND1007 | targeted M1          | ND1007_KINETICS_D8_CD4011B6_CD40Ldoc_cohFluM1_S16_L001_R1_001.fastq.gz   | 1.00E+06   | 589,719              |
| NS_7                | ND1007 | no antigen           | ND1007_NO_STIM_CONTROL_S10_L001_R1_001.fastq.gz                          | 1.00E+06   | 1,061,943            |

**Supplemental Table 4. Cell count inputs and final read depths for all samples analyzed.**
